# Supplementary material for: Ethnicity as a predictor of nonmotor symptoms impact on quality of life in patients with Parkinson’s disease: A systematic review
Source: bioRxiv or medRxiv preprint supplement (doi:10.1101/2023.10.31.23297865), 2023-11-01
Supplement: Supplementary file [file media-1.pdf]

**Appendix 1** Summary of database search strategy (last reviewed 15th September 2023)

|                                                                                                                                                                                                                                                                       |
|-----------------------------------------------------------------------------------------------------------------------------------------------------------------------------------------------------------------------------------------------------------------------|
| <b>Syntax used for NMS and QoL in PD search</b>                                                                                                                                                                                                                       |
| <b>PubMed search (Search 1)</b>                                                                                                                                                                                                                                       |
| ("Parkinson disease"[MeSH Terms] OR "Parkinson"[tw] OR "Parkinson's"[tw] OR "Parkinsons"[tw]) AND ("quality of life"[MeSH Terms] OR "quality of life") AND ("questionnaire" OR "questionnaires" OR "rating" OR "PDQ-39" OR "HADS-P" OR "UPDRS" OR "NMSS")             |
| Search yielded (1808 ) results                                                                                                                                                                                                                                        |
| <b>Ovid search (search 2)</b>                                                                                                                                                                                                                                         |
| <p>1 exp Parkinson disease/ or (Parkinson or Parkinson s or Parkinson's).ti,ab.</p> <p>2 exp "quality of life"/ or quality of life.ti,ab.</p> <p>3 (questionnaire or questionnaires or rating or PDQ-39 or HADS-P or UPDRS or NMSS).ti,ab.</p> <p>4 1 and 2 and 3</p> |
| Search yielded (4264 )results                                                                                                                                                                                                                                         |
| <b>Scopus search (search 3)</b>                                                                                                                                                                                                                                       |
| ( TITLE-ABS-KEY ( parkinson OR parkinsons OR parkinson's ) AND TITLE-ABS-KEY ( "quality of life" ) AND TITLE-ABS-KEY ( questionnaire OR questionnaires OR rating OR "PDQ-39" OR "HADS-P" OR "UPDRS" OR "NMSS" )                                                       |
| Search yielded ( 2910 ) results                                                                                                                                                                                                                                       |
| <b>Total search results (8982)</b>                                                                                                                                                                                                                                    |

**APPENDIX 2** QUALITY ASSESSMENT OF INCLUDED STUDIES.

| No.                | Criteria                                            | Maximum score | (Liu et al., 2015) | (Duncan et al., 2014) | (Rodriguez-Violante et al., 2013) | (Salar et al., 2017) | (Berganzo et al., 2016) | (Shalash et al., 2018) | (Kwon et al., 2016) | (Arabambi, Oshinaike and Ogun., 2019) | (Prakash, 2016) | (Li et al., 2010) | (Song et al., 2014) | (Wu et al., 2016) | (Azmin et al., 2014) | (Hu et al., 2018) | (Lee et al., 2015) | (L. Kadastik-Eerme et al., 2016) | (Eerme, 2015) | (Skorvanek, 2015) | (Pappala et al., 2019) | (Gulunay et al., 2020) | (Karri, Ramasamy and Kalidoss, 2020) |
|--------------------|-----------------------------------------------------|---------------|--------------------|-----------------------|-----------------------------------|----------------------|-------------------------|------------------------|---------------------|---------------------------------------|-----------------|-------------------|---------------------|-------------------|----------------------|-------------------|--------------------|----------------------------------|---------------|-------------------|------------------------|------------------------|--------------------------------------|
| 1                  | Study objectives                                    | 1             | 1                  | 1                     | 1                                 | 1                    | 1                       | 1                      | 1                   | 1                                     | 1               | 1                 | 1                   | 1                 | 1                    | 1                 | 1                  | 1                                | 1             | 1                 | 1                      | 1                      | 1                                    |
| 2                  | Study design                                        | 1             | 1                  | 1                     | 1                                 | 1                    | 1                       | 1                      | 1                   | 1                                     | 1               | 1                 | 1                   | 1                 | 1                    | 1                 | 1                  | 1                                | 1             | 1                 | 1                      | 1                      | 1                                    |
| 3                  | Cognition of studied population                     | 2             | 0                  | 1                     | 0                                 | 1                    | 0                       | 1                      | 1                   | 0                                     | 1               | 2                 | 2                   | 2                 | 1                    | 2                 | 2                  | 2                                | 2             | 1                 | 0                      | 2                      | 2                                    |
| 4                  | Characteristics of studied population               | 2             | 1                  | 2                     | 2                                 | 2                    | 2                       | 2                      | 2                   | 1                                     | 2               | 2                 | 2                   | 2                 | 1                    | 2                 | 2                  | 2                                | 2             | 2                 | 1                      | 2                      | 2                                    |
| 5                  | Sampling method for recruitment of study population | 2             | 2                  | 2                     | 2                                 | 2                    | 2                       | 2                      | 2                   | 2                                     | 2               | 2                 | 2                   | 2                 | 2                    | 2                 | 2                  | 2                                | 2             | 2                 | 2                      | 2                      | 2                                    |
| 6                  | Sample size                                         | 2             | 2                  | 1                     | 1                                 | 0                    | 1                       | 0                      | 2                   | 1                                     | 2               | 0                 | 2                   | 2                 | 1                    | 2                 | 1                  | 2                                | 2             | 0                 | 0                      | 0                      | 1                                    |
| 7                  | Definition of the concept of HRQoL                  | 1             | 0                  | 0                     | 0                                 | 0                    | 0                       | 0                      | 0                   | 0                                     | 0               | 1                 | 1                   | 0                 | 0                    | 0                 | 0                  | 0                                | 0             | 0                 | 0                      | 0                      | 0                                    |
| 8                  | Justified choice of HRQoL-assessing instrument      | 2             | 2                  | 2                     | 2                                 | 2                    | 1                       | 1                      | 1                   | 2                                     | 2               | 1                 | 2                   | 2                 | 2                    | 1                 | 1                  | 2                                | 2             | 2                 | 2                      | 2                      | 2                                    |
| 9                  | Justified choice of NMS-assessing instrument        | 2             | 2                  | 2                     | 2                                 | 2                    | 1                       | 1                      | 1                   | 2                                     | 2               | 1                 | 2                   | 2                 | 2                    | 1                 | 1                  | 2                                | 2             | 2                 | 2                      | 2                      | 2                                    |
| 10                 | Comprehensible statistical methods                  | 1             | 1                  | 1                     | 1                                 | 1                    | 1                       | 1                      | 1                   | 1                                     | 1               | 1                 | 1                   | 1                 | 1                    | 1                 | 1                  | 1                                | 1             | 1                 | 1                      | 1                      | 1                                    |
| 11                 | Main factors associated with HRQoL                  | 1             | 1                  | 1                     | 1                                 | 1                    | 1                       | 1                      | 1                   | 1                                     | 1               | 1                 | 1                   | 1                 | 1                    | 1                 | 1                  | 1                                | 1             | 1                 | 1                      | 1                      | 1                                    |
| 12                 | Main NMS features associated with HRQoL             | 1             | 1                  | 1                     | 1                                 | 0                    | 1                       | 1                      | 1                   | 1                                     | 1               | 1                 | 1                   | 1                 | 1                    | 1                 | 1                  | 1                                | 1             | 0                 | 1                      | 1                      | 1                                    |
| 13                 | Agreement / disagreement with other studies         | 2             | 2                  | 2                     | 2                                 | 2                    | 2                       | 2                      | 2                   | 2                                     | 1               | 2                 | 2                   | 2                 | 2                    | 2                 | 2                  | 2                                | 2             | 2                 | 2                      | 2                      | 2                                    |
| 14                 | Limitations                                         | 1             | 1                  | 1                     | 1                                 | 1                    | 1                       | 1                      | 1                   | 1                                     | 1               | 1                 | 0                   | 1                 | 1                    | 1                 | 1                  | 1                                | 1             | 1                 | 1                      | 1                      | 1                                    |
| <b>Total score</b> |                                                     | 21            | 17                 | 18                    | 17                                | 17                   | 15                      | 15                     | 17                  | 16                                    | 18              | 17                | 20                  | 20                | 17                   | 18                | 17                 | 20                               | 19            | 14                | 18                     | 19                     |                                      |
| <b>Comment</b>     |                                                     | Good          | Good               | Good                  | Good                              | Good                 | Good                    | Good                   | Good                | Good                                  |                 |                   |                     |                   | Good                 |                   | Good               | Good                             |               | Fair              | Good                   | Good                   |                                      |







| Ethnicity      | Study                                | CVS   | Sleep/<br>Fatigue | Mood/<br>Cognition | Perception | Attention<br>Memory | GIT    | Urinary | Sexual<br>function | Other  |
|----------------|--------------------------------------|-------|-------------------|--------------------|------------|---------------------|--------|---------|--------------------|--------|
| East Asian     | (Li et al., 2010)                    | 0.109 | 0.34              | 0.69               | 0.212      | 0.202               | 0.384  | 0.248   | 0.006              | 0.323  |
|                | (Song et al., 2014)                  | 0.28  | 0.6               | 0.55               | 0.3        | 0.42                | 0.44   | 0.33    | 0.12               | 0.46   |
|                | (Wu et al., 2016)                    | 0.258 | 0.561             | 0.659              | 0.19       | 0.46                | 0.333  | 0.119   | 0.075              | 0.321  |
|                | (Hu et al., 2018)                    | 0.206 | 0.527             | 0.573              | 0.19       | 0.333               | 0.277  | 0.193   | 0.078              | 0.298  |
|                | (Kwon et al., 2016)                  | 0.457 | 0.528             | 0.573              | 0.343      | 0.425               | 0.43   | 0.363   | 0.26               |        |
|                | (Lee et al., 2015)                   | 0.305 | 0.559             | 0.669              | 0.313      | 0.557               | 0.383  | 0.435   | 0.335              | 0.735  |
|                | (Liu et al., 2015)                   | 0.403 | 0.461             | 0.607              | 0.371      | 0.411               | 0.383  | 0.172   | 0.253              | 0.258  |
|                | (Prakash, 2016)                      |       | 0.30*             | 0.32*              |            | 0.63*               |        |         |                    |        |
|                | (Azmin et al., 2014)                 | 0.563 | 0.469             | 0.588              | 0.336      | 0.281               | 0.412  | 0.154   | 0.173              | 0.258  |
| South Asian    | (Pappala et al., 2019)               | 0.24  | 0.54              | 0.49               | 0.49       | 0.28                | 0.35   | 0.25    | 0.4                | 0.26   |
| Caucasian      | (Duncan et al., 2014)                |       | 0.438             | 0.307**            |            | 0.2**               | 0.15** |         |                    |        |
|                | (Skorvanek, 2015)                    |       | 0.18**            |                    |            |                     |        |         |                    | 0.25** |
| Mediterranean  | (Berganzo et al., 2016)              |       | 0.44              | 0.54               |            | 0.24                |        | 0.24    | 0.24               | 0.17   |
| Hispanic       | (Rodriguez-Violante et al., 2013)    |       | 0.51              | 0.52               |            | 0.53                |        |         |                    |        |
| Middle Eastern | (Gulunay et al., 2020)               |       |                   | 0.66               | 0.72       |                     | 0.247  |         | 0.472              | 0.232  |
|                | (Salar et al., 2017)                 | 0.11  | 0.363             | 0.377              | 0.392      | 0.395               | 0.11   | 0.158   | 0.12               | 0.116  |
| North African  | (Shalash et al., 2018)               | 0.198 | 0.659             | 0.681              | 0.263      | 0.421               | 0.452  | 0.414   | 0.151              | -      |
| West African   | (Arabambi, Oshinaike and Ogun, 2019) | 0.556 | 0.713             | 0.74               | 0.417      | 0.353               | 0.533  | 0.621   | 0.494              | 0.539  |
